# Supplementary material for: Toxin-Antitoxin Systems Are Important for Niche-Specific Colonization and Stress Resistance of Uropathogenic Escherichia coli
Source: PLoS Pathog. 2012 Oct 4;8(10):e1002954. doi: 10.1371/journal.ppat.1002954 (PMC3464220; doi:10.1371/journal.ppat.1002954)
Supplement: Table S2 — Plasmids used in this study. (PDF) [file ppat.1002954.s007.pdf]

**Table S2. Plasmids used in this study**

| Plasmid  | Description                                                                             | Source     |
|----------|-----------------------------------------------------------------------------------------|------------|
| pKD3     | template plasmid for gene disruption; contains FRT flanked Clm <sup>R</sup> cassette    | [1]        |
| pKD4     | template plasmid for gene disruption; contains FRT flanked Kan <sup>R</sup> cassette    | [1]        |
| pKM208   | Amp <sup>R</sup> ; encodes IPTG-inducible lambda red recombinase                        | [2]        |
| pRR48    | Amp <sup>R</sup> cloning plasmid containing an IPTG inducible <i>Ptac</i> promoter      | [3]        |
| pBAD33   | Clm <sup>R</sup> cloning plasmid containing arabinose inducible pBAD promoter           | [4]        |
| pGEN-MCS | High retention Amp <sup>R</sup> cloning plasmid                                         | [5]        |
| pPN007   | Amp <sup>R</sup> ; <i>pasT</i> (from CFT073) cloned into PstI, HindIII of pRR48         | This study |
| pPN009   | Amp <sup>R</sup> ; <i>pasT</i> (from CFT073) cloned into BamHI, KpnI of pRR48           | This study |
| pPN010   | Amp <sup>R</sup> ; <i>pasI</i> (from CFT073) cloned into BamHI, KpnI of pRR48           | This study |
| pPN011   | Amp <sup>R</sup> ; <i>pasTI</i> (from CFT073) cloned into BamHI, KpnI of pRR48          | This study |
| pPN012   | Amp <sup>R</sup> ; <i>pasT</i> (from CFT073) with C-terminal FLAG cloned into PstI,     | This study |
| pPN019   | Amp <sup>R</sup> ; <i>pasT</i> (from CFT073) with GGGGP linker and C-terminal FLAG      | This study |
| pPN020   | Amp <sup>R</sup> ; <i>pasT</i> (from CFT073) with GGGGP linker and N-terminal FLAG      | This study |
| pPN025   | Amp <sup>R</sup> ; <i>pasT</i> (from CFT073) with N-terminal FLAG cloned into PstI,     | This study |
| pPN028   | Amp <sup>R</sup> ; <i>pasT</i> (from MG1655) cloned into PstI, HindIII of pRR48         | This study |
| pPN041   | Amp <sup>R</sup> ; <i>pasT</i> (from CFT073) with N-terminal 6X-His cloned into PstI,   | This study |
| pPN043   | Amp <sup>R</sup> ; <i>pasT</i> (from CFT073) with C-terminal 6X-His cloned into PstI,   | This study |
| pPN055   | Amp <sup>R</sup> ; first 207 nucleotides of <i>pasT</i> (from CFT073) cloned into PstI, | This study |
| pPN060   | Clm <sup>R</sup> ; <i>pasI</i> (from CFT073) cloned into SacI, HindIII of pBAD33 with   | This study |
| pPN064   | Amp <sup>R</sup> ; nucleotides 208-477 of <i>pasT</i> (from CFT073) cloned into PstI,   | This study |

|        |                                                                                                                                                                                  |            |
|--------|----------------------------------------------------------------------------------------------------------------------------------------------------------------------------------|------------|
| pPN067 | Amp <sup>R</sup> ; nucleotides 28-477 of <i>pasT</i> (from CFT073) cloned into PstI,                                                                                             | This study |
| pPN068 | Amp <sup>R</sup> ; nucleotides 40-477 of <i>pasT</i> (from CFT073) cloned into PstI,                                                                                             | This study |
| pPN069 | Amp <sup>R</sup> ; nucleotides 88-477 of <i>pasT</i> (from CFT073) cloned into PstI,                                                                                             | This study |
| pPN078 | Amp <sup>R</sup> ; <i>pasT</i> (from CFT073) with C-terminal FLAG tag cloned into                                                                                                | This study |
| pPN079 | Amp <sup>R</sup> ; nucleotides 28-477 of <i>pasT</i> (from CFT073) with C-terminal                                                                                               | This study |
| pPN080 | Amp <sup>R</sup> ; nucleotides 40-477 of <i>pasT</i> (from CFT073) with C-terminal                                                                                               | This study |
| pPN081 | Amp <sup>R</sup> ; nucleotides 88-477 of <i>pasT</i> (from CFT073) with C-terminal                                                                                               | This study |
| pPN083 | Amp <sup>R</sup> ; <i>pasTI</i> operon including native promoter (243 bp upstream of<br><i>pasTI</i> ; all sequences from CFT073) cloned into HindIII, NcoI sites of<br>pGEN-MCS | This study |

---

## Supplemental References

1. Datsenko KA, Wanner BL (2000) One-step inactivation of chromosomal genes in *Escherichia coli* K-12 using PCR products. *Proc Natl Acad Sci U S A* 97: 6640-6645.
2. Murphy KC, Campellone KG (2003) Lambda Red-mediated recombinogenic engineering of enterohemorrhagic and enteropathogenic *E. coli*. *BMC Mol Biol* 4: 11.
3. Zhou Q, Ames P, Parkinson JS (2009) Mutational analyses of HAMP helices suggest a dynamic bundle model of input-output signalling in chemoreceptors. *Mol Microbiol* 73: 801-814.
4. Guzman LM, Belin D, Carson MJ, Beckwith J (1995) Tight regulation, modulation, and high-level expression by vectors containing the arabinose PBAD promoter. *J Bacteriol* 177: 4121-4130.
5. Lane MC, Alteri CJ, Smith SN, Mobley HL (2007) Expression of flagella is coincident with uropathogenic *Escherichia coli* ascension to the upper urinary tract. *Proc Natl Acad Sci U S A* 104: 16669-16674.
